# Supplementary material for: Sudden death in individuals with obstructive sleep apnoea: a systematic review and meta-analysis
Source: HighWire-hosted journal article supplement (doi:10.1136/bmjresp-2020-000656), 2021-06-01
Supplement: bmjresp-2020-000656supp001_data_supplement.pdf [file bmjresp-2020-000656supp001_data_supplement.pdf]

Supplementary materials to: **Sudden death in individuals with obstructive sleep apnea: a systematic review and meta-analysis**

|                        | Topic                                                                                                                                                | Page number |
|------------------------|------------------------------------------------------------------------------------------------------------------------------------------------------|-------------|
| <b>Title</b>           | Identify the study as a meta-analysis (or systematic review)                                                                                         | 1           |
| <b>Abstract</b>        | Use the journal's structured format                                                                                                                  | 2           |
| <b>Introduction</b>    | <b>Present:</b>                                                                                                                                      |             |
|                        | The clinical problem                                                                                                                                 | 5           |
|                        | The hypothesis                                                                                                                                       | 6           |
|                        | A statement of objectives that includes the study population, the condition of interest, the exposure or intervention, and the outcome(s) considered | 5-6         |
| <b>Sources</b>         | <b>Describe:</b>                                                                                                                                     |             |
|                        | Qualifications of searchers (eg, librarians and investigators)                                                                                       | 6           |
|                        | Search strategy, including time period included in the synthesis and keywords                                                                        | 6           |
|                        | Effort to include all available studies, including contact with authors                                                                              | 6-7         |
|                        | Databases and registries searched                                                                                                                    | 6           |
|                        | Search software used, name and version, including special features used (e.g. explosion)                                                             | 6           |
|                        | Use of hand searching (e.g. reference lists of obtained articles)                                                                                    | 6           |
|                        | List of citations located and those excluded, including justification                                                                                | 6           |
|                        | Method of addressing articles published in languages other than English                                                                              | 6           |
|                        | Method of handling abstracts and unpublished studies                                                                                                 | 6           |
|                        | Description of any contact with authors                                                                                                              | 6           |
| <b>Study Selection</b> | <b>Describe</b>                                                                                                                                      |             |
|                        | Types of study designs considered                                                                                                                    | 7           |
|                        | Relevance or appropriateness of studies gathered for assessing the hypothesis to be tested                                                           | 7           |
|                        | Rationale for the selection and coding of data (eg, sound clinical principles or convenience)                                                        | 7           |
|                        | Documentation of how data were classified and coded (eg, multiple raters, blinding, and inter-rater reliability)                                     | 7           |
|                        | Assessment of confounding (e.g. comparability of cases and controls in studies where appropriate)                                                    | 7           |
|                        | Assessment of study quality, including blinding of quality assessors; stratification or regression on possible predictors of study results           | 7-8         |
|                        | Assessment of heterogeneity                                                                                                                          | 8-9         |

|                   |                                                                                                                                                                                                                                                               |          |
|-------------------|---------------------------------------------------------------------------------------------------------------------------------------------------------------------------------------------------------------------------------------------------------------|----------|
|                   | Statistical methods (eg, complete description of fixed or random effects models, justification of whether the chosen models account for predictors of study results, dose-response models, or cumulative meta-analysis) in sufficient detail to be replicated | 8-9      |
| <b>Results</b>    | <b>Present</b>                                                                                                                                                                                                                                                |          |
|                   | A graph summarizing individual study estimates and the overall estimate                                                                                                                                                                                       | Figure 2 |
|                   | A table giving descriptive information for each included study                                                                                                                                                                                                | Table 1  |
|                   | Results of sensitivity testing (eg, subgroup analysis)                                                                                                                                                                                                        | 11-12    |
|                   | Indication of statistical uncertainty of findings                                                                                                                                                                                                             | 11-12    |
| <b>Discussion</b> | <b>Discuss</b>                                                                                                                                                                                                                                                |          |
|                   | Strengths and weaknesses                                                                                                                                                                                                                                      | 15       |
|                   | Potential biases in the review process (eg, publication bias)                                                                                                                                                                                                 | 15       |

**Supplemental Table 1:** Meta-Analyses and Systematic Reviews of Observational Studies (MOOSE)

| Database | Search period           | Search terms                                                                                                                                                                                                              |
|----------|-------------------------|---------------------------------------------------------------------------------------------------------------------------------------------------------------------------------------------------------------------------|
| MEDLINE  | 1946 to January 1, 2020 | <ol style="list-style-type: none"> <li>1. Sleep</li> <li>2. Obstructive</li> <li>3. Apnoea</li> <li>4. Sudden death</li> <li>5. Cardiac death</li> <li>6. 1 AND 2 AND 3</li> <li>7. 4 OR 5</li> <li>8. 6 AND 7</li> </ol> |

**Supplemental Table 2:** MEDLINE Search strategy for studies assessing the association of obstructive sleep apnea and sudden death.

| Author             | Year | Country | Sample size (n) | Study type    | Average follow-up | Mean age | Male (%) | Covariates adjusted for                                                                                                                                                                                                                                                                       | Study quality score |
|--------------------|------|---------|-----------------|---------------|-------------------|----------|----------|-----------------------------------------------------------------------------------------------------------------------------------------------------------------------------------------------------------------------------------------------------------------------------------------------|---------------------|
| Kerns et al        | 2018 | USA     | 558             | Cohort        | 2 y               | 56       | 56       | Age, gender, ethnicity, obstructive sleep apnea, Charlson comorbidity index, BMI. History of atrial fibrillation, left ventricular mass index, Kt/V, IDW chance, IDW change/body weight, weight-to-hip ratio                                                                                  | 9                   |
| Gami et al         | 2013 | USA     | 10,701          | Cohort        | 5.3 y             | 53       | 68       | Age, hypertension, coronary artery disease, cardiomyopathy or heart failure, ventricular ectopy or NSVT, apnea-hypopnea index (per 10), mean nocturnal O <sub>2</sub> saturation (per 10%), lowest nocturnal O <sub>2</sub> saturation (per 10%)                                              | 7                   |
| Szentkiralyi et al | 2011 | Hungary | 823             | Cohort        | 66 mo             | 49       | 59       | Age sex, number of comorbidities, hypertension (presence of antihypertensive medication), duration of renal failure, eGFR, BMI, serum albumin, hemoglobin, cold ischaemic time, delayed graft function, acute rejection, HLA mismatch                                                         | 9                   |
| Shah et al         | 2009 | USA     | 1,436           | Cohort        | 2.9 y             | 59       | 49       | Age, race, gender, diabetes, hypertension, atrial fibrillation, hyperlipidemia, body mass index (per 1 unit), tobacco use, alcohol use, obstructive sleep apnea (AHI $\geq$ 5)                                                                                                                | 8                   |
| Sahlin et al       | 2008 | Sweden  | 132             | Cohort        | 10 y              | 63       | 82       | Obstructive sleep apnea, central sleep apnea, sex, smoking status, hypertension, diabetes mellitus, atrial fibrillation, age increase in 8 y, body mass index increase in 4, Mini-Mental State Examination score increase in 8 U, Barthel index of activities of daily living increase in 7 U | 9                   |
| Yaggi et al        | 2005 | USA     | 1,022           | Cohort        | 3.4 y             | -        | -        | Age, male sex, race, body-mass index, current smoker, current consumption of alcohol, diabetes mellitus, atrial fibrillation, hyperlipidemia, hypertension, obstructive sleep apnea syndrome                                                                                                  | 8                   |
| Gami et al         | 2005 | USA     | 112             | Observational | -                 | -        | -        | Time of day (midnight-5:59AM, 6AM-11:59AM, noon-5:59PM, 6PM-11:59PM)                                                                                                                                                                                                                          | 9                   |
| Tiwari et al       | 2019 | USA     | 4,014           | Cohort        | 6.1 y             | 63       | 48       | Age, gender, race, cause ESRD, living vs. deceased donor, prior transplant, year of transplant, induction immunosuppressant, HLA mismatch, duration of pre-Tx OSA diagnosis, donor age, PR,                                                                                                   | 9                   |

|                     |      |             |       |        |                 |    |    |                                                                                                                                                                                                                                                                                                                    |   |
|---------------------|------|-------------|-------|--------|-----------------|----|----|--------------------------------------------------------------------------------------------------------------------------------------------------------------------------------------------------------------------------------------------------------------------------------------------------------------------|---|
|                     |      |             |       |        |                 |    |    | duration of pre-Tx dialysis, BMI at transplant, diabetes,                                                                                                                                                                                                                                                          |   |
| Butler et al        | 2019 | USA         | 5,712 | Cohort | 11 y            | -  | -  | Age, gender, body mass index, race, smoking status, AHI, hypertension, diabetes, coronary heart disease, stroke, heart failure                                                                                                                                                                                     | 9 |
| Fan et al           | 2019 | China       | 804   | Cohort | 1 y             | 58 | 83 | Age, sex, body mass index, hypertension, diabetes mellitus, clinical presentation (acute myocardial infarction vs unstable angina), PCI procedure, minimum SaO <sub>2</sub> , MACCE (ischemia-driven revascularization, hospitalization for unstable angina), all repeat vascularization, composite of all events, | 8 |
| Shantha et al       | 2018 | USA         | 548   | Cohort | 77 mo           | 65 | 61 | Age, sex, obesity, atrial fibrillation diagnosis, OSA severity, presence of typical LBBB, QRS complex duration >150 ms, BiV pacing >90%, CSA diagnosis                                                                                                                                                             | 9 |
| Lee et al           | 2013 | South Korea | 2,240 | Cohort | 61.4 mo         | -  | -  | Age, sex, body mass index, diabetes, hypertension, cardiovascular diseases, and previous history of stroke, treatment                                                                                                                                                                                              | 9 |
| Yeboah et al        | 2011 | USA         | 5,338 | Cohort | 7.5 y           | -  | -  | age, gender, race/ethnicity, BMI, smoking, diabetes mellitus, total cholesterol, HDL, triglycerides, systolic BP, current alcohol use, benzodiazepine use, BP medications and statin use                                                                                                                           | 9 |
| Anandam et al       | 2013 | USA         | 669   | Cohort | 79 mo           | -  | -  | Hypertension, current smoking, previous heart disease, CPAP-treated OSA, MAD-treated OSA, untreated OSA                                                                                                                                                                                                            | 9 |
| Marshall et al      | 2008 | Australia   | 380   | Cohort | 13.4 y          | -  | -  | Gender, age, mean arterial pressure, high density lipoprotein cholesterol, total cholesterol, diabetes, angina, smoking categories, body mass categories, sleep apnea                                                                                                                                              | 9 |
| Choi et al          | 2017 | South Korea | 4,225 | Cohort | 18 years        | 49 | 71 | Age, gender, BMI, hypertension, diabetes                                                                                                                                                                                                                                                                           | 9 |
| Korostovtseva et al | 2011 | Russia      | 234   | Cohort | 46 mo           | 52 | 61 | AHI 5-14.9 per hour, AHR 12-29.9 per house, AHI ≥30 per hour, sex, age, BMI, coronary heart disease, duration of hypertension, glucose metabolism impairment, family history, alcohol use, smoking, physical activity                                                                                              | 9 |
| Wang et al          | 2007 | Canada      | 218   | Cohort | 2.9 ± 2.2 years | -  | -  | Untreated OSA, LVEF, NYHA functional class, age                                                                                                                                                                                                                                                                    | 9 |
| Young et al         | 2008 | USA         | 1,522 | Cohort | 18 y            | 48 | 55 | Age, sex, hypertension (BP ≥ 140 systolic or ≥ 90 diastolic or use of antihypertensive                                                                                                                                                                                                                             | 9 |

|                       |      |         |     |        |         |    |    |                                                                                                                                                                  |   |
|-----------------------|------|---------|-----|--------|---------|----|----|------------------------------------------------------------------------------------------------------------------------------------------------------------------|---|
|                       |      |         |     |        |         |    |    | medication), self-reported diagnosis of diabetes, coronary artery disease, cardiovascular disease, heart failure, myocardial infarction, cardiac surgery, stroke |   |
| Martinez-garcia et al | 2012 | Spain   | 939 | Cohort | 69 mo   | -  | -  | OSA group, age, sex, type of sleep study, sleep clinic, BMI, diabetes mellitus, smoking habit, ESS, dyslipidemia, CVEs, AHT                                      | 9 |
| Murajo-murro et al    | 2013 | Finland | 405 | Cohort | 15 y mo | -  | -  | Age, BMI, smoking                                                                                                                                                | 9 |
| Uchôa et al           | 2015 | Brazil  | 67  | Cohort | 4.5 y   | 57 | 75 | Age, male sex, waist circumference, statins, ACEI/ARB, LV ejection fraction, OSA                                                                                 | 9 |

### Supplemental Table 3: Characteristics of studies included in the meta-analysis

Abbreviations: USA: United States of America; AHI: Apnea-Hypoxia Index; OSA: Obstructive Sleep Apnea; BMI: Body Mass Index; ACEI/ARB: Angiotensin Converting Enzyme/Angiotensin Receptor Blocker; eGFR: Estimated Glomerular Filtration Rate; BP: Blood Pressure; LV: Left Ventricular.

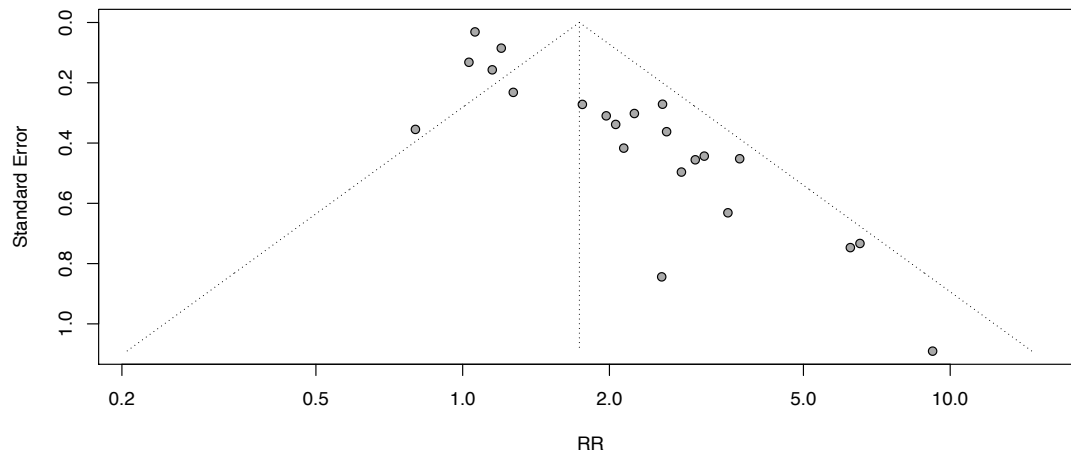

**Supplemental Figure 1: Funnel plot for the 22 studies included in the meta-analysis**

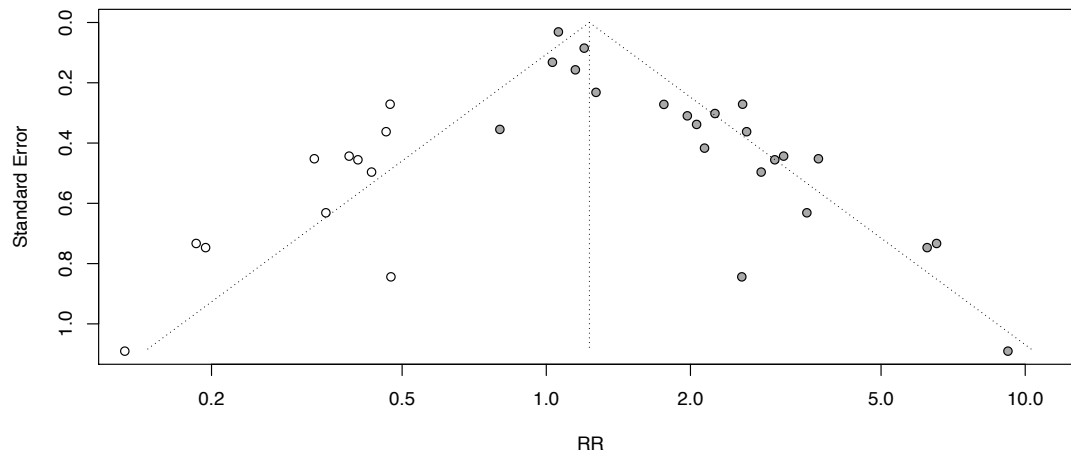

**Supplemental Figure 2: Funnel plot after trim and fill methods**

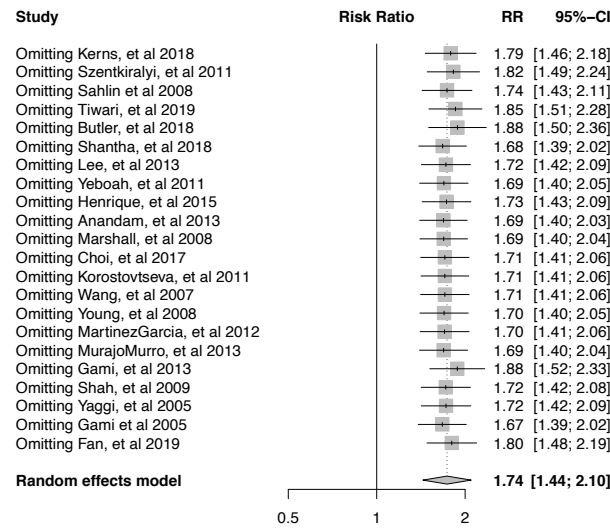

**Supplemental Figure 3:** Influence sensitivity analyses (leave-One-Out method)
